# Supplementary material
Source: MDPI journal article supplement (https://www.mdpi.com/2073-4395/4/4/470)
Supplement: s2 [file s2]

## Sheet: Instruction
	Supplement to M. Weih (2014) A Calculation Tool for Analyzing Nitrogen Use Efficiency in Annual and Perennial Crops. Agronomy 4: 470-477.
	Background and theory:
	Weih M., Asplund L., Bergkvist G. (2011) Assessment of nutrient use in annual and perennial crops: A functional concept for analyzing nitrogen use efficiency. Plant and Soil 339: 513-520.
	The sheet called "NUE calculation tool" can be used to calculate the NUE and its components according to the method described in the above paper.
	Explanations to the NUE calculation tool:
	Shaded background indicates input variables and light background indicates the calculated output.
	Columns A to C are reserved for data description.
	Columns D to O are used for the calculation of mean N during the main growth period (N') and are identical to Table 1 in the publication.
	Columns P to V are used for the calculation of NUE and its components.
	Columns W to Y are used for the calculation of soil N-based NUE.
	All input and output variables are briefly described with comments directly added to the column labels of the corresponding variable in the calculation sheet.
	The example data ("Wheat 1 & 2, Salix 1 & 2) are realistic values to illustrate the calculations; further explanations are found in the publication.
	Please fill in your input data in the shaded empty cells below the example data, and the output will be calculated automatically as soon as the required input is in the sheet.
	Contact details for questions and suggestions regarding the calculation tool:
		Martin Weih
		Swedish University of Agricultural Sciences
		Department of Crop Production Ecology
		P.O. Box 7043 (visiting address: Ulls väg 16)
		SE-750 07 Uppsala, Sweden
		Phone +46-18-67 25 43, FAX +46-18-67 28 90
		Email:	martin.weih@slu.se
		Website:	http://www.slu.se/weih

## Sheet: NUE calculation tool
Crop/variety/genotype	Treatment1	Treatment2	tN’i	tN’f	tH1	tH2	N’H1	N’H2	RN	Constant c	N’i	N’f	N’	N’H1H2	Np	Ny	By	UN	EN,y	CN,y	NUE	Soil N supply	UN, Soil	NUESoil	Remarks
			(day)	(day)	(day)	(day)	(g N m-2)	(g N m-2)	(day-1)		(g N m-2)	(g N m-2)	(g N m-2)	(g N m-2)	(g N m-2)	(g N m-2)	(g m-2)	(g g-1)	(g g-1)	(g g-1)	(g g-1)	(g N m-2)	(g g-1)	(g g-1)
Wheat 1			9	45	11	40	0.38	9.1	0.109512	-2.17222	0.305255	15.7342	8.01972	4.74	0.5	15	800	16.0394	99.7541	0.01875	30	60	0.133662	0.25
Wheat 2			11	64	11	40	0.25	1.8	0.0680718	-2.13508	0.25	9.22123	4.73562	1.025	0.5	10	400	9.47123	84.4663	0.025	20	9	0.52618	1.11111
Salix 1			77	252	125	250	4.6	15.9	0.0099221	0.285793	2.85707	16.2187	9.53787	10.25	2.5	5.5	1500	3.81515	157.268	0.00366667	2.2	16	0.596117	0.34375
Salix 2			115	283	125	250	0.9	3.2	0.0101481	-1.37387	0.813149	4.4729	2.64303	2.05	0.8	1	400	3.30378	151.342	0.0025	1.25	6	0.440504	0.166667
									#NUM!	#NUM!	#NUM!	#NUM!	#NUM!	0				#NUM!	#NUM!	#DIV/0!	#NUM!		#NUM!	#NUM!
									#NUM!	#NUM!	#NUM!	#NUM!	#NUM!	0				#NUM!	#NUM!	#DIV/0!	#NUM!		#NUM!	#NUM!
									#NUM!	#NUM!	#NUM!	#NUM!	#NUM!	0				#NUM!	#NUM!	#DIV/0!	#NUM!		#NUM!	#NUM!
									#NUM!	#NUM!	#NUM!	#NUM!	#NUM!	0				#NUM!	#NUM!	#DIV/0!	#NUM!		#NUM!	#NUM!
									#NUM!	#NUM!	#NUM!	#NUM!	#NUM!	0				#NUM!	#NUM!	#DIV/0!	#NUM!		#NUM!	#NUM!
									#NUM!	#NUM!	#NUM!	#NUM!	#NUM!	0				#NUM!	#NUM!	#DIV/0!	#NUM!		#NUM!	#NUM!
									#NUM!	#NUM!	#NUM!	#NUM!	#NUM!	0				#NUM!	#NUM!	#DIV/0!	#NUM!		#NUM!	#NUM!
									#NUM!	#NUM!	#NUM!	#NUM!	#NUM!	0				#NUM!	#NUM!	#DIV/0!	#NUM!		#NUM!	#NUM!
									#NUM!	#NUM!	#NUM!	#NUM!	#NUM!	0				#NUM!	#NUM!	#DIV/0!	#NUM!		#NUM!	#NUM!
									#NUM!	#NUM!	#NUM!	#NUM!	#NUM!	0				#NUM!	#NUM!	#DIV/0!	#NUM!		#NUM!	#NUM!
									#NUM!	#NUM!	#NUM!	#NUM!	#NUM!	0				#NUM!	#NUM!	#DIV/0!	#NUM!		#NUM!	#NUM!
									#NUM!	#NUM!	#NUM!	#NUM!	#NUM!	0				#NUM!	#NUM!	#DIV/0!	#NUM!		#NUM!	#NUM!
									#NUM!	#NUM!	#NUM!	#NUM!	#NUM!	0				#NUM!	#NUM!	#DIV/0!	#NUM!		#NUM!	#NUM!
									#NUM!	#NUM!	#NUM!	#NUM!	#NUM!	0				#NUM!	#NUM!	#DIV/0!	#NUM!		#NUM!	#NUM!
									#NUM!	#NUM!	#NUM!	#NUM!	#NUM!	0				#NUM!	#NUM!	#DIV/0!	#NUM!		#NUM!	#NUM!
									#NUM!	#NUM!	#NUM!	#NUM!	#NUM!	0				#NUM!	#NUM!	#DIV/0!	#NUM!		#NUM!	#NUM!
									#NUM!	#NUM!	#NUM!	#NUM!	#NUM!	0				#NUM!	#NUM!	#DIV/0!	#NUM!		#NUM!	#NUM!
									#NUM!	#NUM!	#NUM!	#NUM!	#NUM!	0				#NUM!	#NUM!	#DIV/0!	#NUM!		#NUM!	#NUM!
									#NUM!	#NUM!	#NUM!	#NUM!	#NUM!	0				#NUM!	#NUM!	#DIV/0!	#NUM!		#NUM!	#NUM!
									#NUM!	#NUM!	#NUM!	#NUM!	#NUM!	0				#NUM!	#NUM!	#DIV/0!	#NUM!		#NUM!	#NUM!
									#NUM!	#NUM!	#NUM!	#NUM!	#NUM!	0				#NUM!	#NUM!	#DIV/0!	#NUM!		#NUM!	#NUM!
									#NUM!	#NUM!	#NUM!	#NUM!	#NUM!	0				#NUM!	#NUM!	#DIV/0!	#NUM!		#NUM!	#NUM!
									#NUM!	#NUM!	#NUM!	#NUM!	#NUM!	0				#NUM!	#NUM!	#DIV/0!	#NUM!		#NUM!	#NUM!
									#NUM!	#NUM!	#NUM!	#NUM!	#NUM!	0				#NUM!	#NUM!	#DIV/0!	#NUM!		#NUM!	#NUM!
									#NUM!	#NUM!	#NUM!	#NUM!	#NUM!	0				#NUM!	#NUM!	#DIV/0!	#NUM!		#NUM!	#NUM!
									#NUM!	#NUM!	#NUM!	#NUM!	#NUM!	0				#NUM!	#NUM!	#DIV/0!	#NUM!		#NUM!	#NUM!
									#NUM!	#NUM!	#NUM!	#NUM!	#NUM!	0				#NUM!	#NUM!	#DIV/0!	#NUM!		#NUM!	#NUM!
									#NUM!	#NUM!	#NUM!	#NUM!	#NUM!	0				#NUM!	#NUM!	#DIV/0!	#NUM!		#NUM!	#NUM!
									#NUM!	#NUM!	#NUM!	#NUM!	#NUM!	0				#NUM!	#NUM!	#DIV/0!	#NUM!		#NUM!	#NUM!
									#NUM!	#NUM!	#NUM!	#NUM!	#NUM!	0				#NUM!	#NUM!	#DIV/0!	#NUM!		#NUM!	#NUM!
									#NUM!	#NUM!	#NUM!	#NUM!	#NUM!	0				#NUM!	#NUM!	#DIV/0!	#NUM!		#NUM!	#NUM!
									#NUM!	#NUM!	#NUM!	#NUM!	#NUM!	0				#NUM!	#NUM!	#DIV/0!	#NUM!		#NUM!	#NUM!
									#NUM!	#NUM!	#NUM!	#NUM!	#NUM!	0				#NUM!	#NUM!	#DIV/0!	#NUM!		#NUM!	#NUM!
									#NUM!	#NUM!	#NUM!	#NUM!	#NUM!	0				#NUM!	#NUM!	#DIV/0!	#NUM!		#NUM!	#NUM!
									#NUM!	#NUM!	#NUM!	#NUM!	#NUM!	0				#NUM!	#NUM!	#DIV/0!	#NUM!		#NUM!	#NUM!
									#NUM!	#NUM!	#NUM!	#NUM!	#NUM!	0				#NUM!	#NUM!	#DIV/0!	#NUM!		#NUM!	#NUM!
									#NUM!	#NUM!	#NUM!	#NUM!	#NUM!	0				#NUM!	#NUM!	#DIV/0!	#NUM!		#NUM!	#NUM!
									#NUM!	#NUM!	#NUM!	#NUM!	#NUM!	0				#NUM!	#NUM!	#DIV/0!	#NUM!		#NUM!	#NUM!
									#NUM!	#NUM!	#NUM!	#NUM!	#NUM!	0				#NUM!	#NUM!	#DIV/0!	#NUM!		#NUM!	#NUM!
									#NUM!	#NUM!	#NUM!	#NUM!	#NUM!	0				#NUM!	#NUM!	#DIV/0!	#NUM!		#NUM!	#NUM!
									#NUM!	#NUM!	#NUM!	#NUM!	#NUM!	0				#NUM!	#NUM!	#DIV/0!	#NUM!		#NUM!	#NUM!
									#NUM!	#NUM!	#NUM!	#NUM!	#NUM!	0				#NUM!	#NUM!	#DIV/0!	#NUM!		#NUM!	#NUM!
									#NUM!	#NUM!	#NUM!	#NUM!	#NUM!	0				#NUM!	#NUM!	#DIV/0!	#NUM!		#NUM!	#NUM!
									#NUM!	#NUM!	#NUM!	#NUM!	#NUM!	0				#NUM!	#NUM!	#DIV/0!	#NUM!		#NUM!	#NUM!
									#NUM!	#NUM!	#NUM!	#NUM!	#NUM!	0				#NUM!	#NUM!	#DIV/0!	#NUM!		#NUM!	#NUM!
									#NUM!	#NUM!	#NUM!	#NUM!	#NUM!	0				#NUM!	#NUM!	#DIV/0!	#NUM!		#NUM!	#NUM!
									#NUM!	#NUM!	#NUM!	#NUM!	#NUM!	0				#NUM!	#NUM!	#DIV/0!	#NUM!		#NUM!	#NUM!
									#NUM!	#NUM!	#NUM!	#NUM!	#NUM!	0				#NUM!	#NUM!	#DIV/0!	#NUM!		#NUM!	#NUM!
									#NUM!	#NUM!	#NUM!	#NUM!	#NUM!	0				#NUM!	#NUM!	#DIV/0!	#NUM!		#NUM!	#NUM!
									#NUM!	#NUM!	#NUM!	#NUM!	#NUM!	0				#NUM!	#NUM!	#DIV/0!	#NUM!		#NUM!	#NUM!
									#NUM!	#NUM!	#NUM!	#NUM!	#NUM!	0				#NUM!	#NUM!	#DIV/0!	#NUM!		#NUM!	#NUM!
									#NUM!	#NUM!	#NUM!	#NUM!	#NUM!	0				#NUM!	#NUM!	#DIV/0!	#NUM!		#NUM!	#NUM!
									#NUM!	#NUM!	#NUM!	#NUM!	#NUM!	0				#NUM!	#NUM!	#DIV/0!	#NUM!		#NUM!	#NUM!
									#NUM!	#NUM!	#NUM!	#NUM!	#NUM!	0				#NUM!	#NUM!	#DIV/0!	#NUM!		#NUM!	#NUM!
									#NUM!	#NUM!	#NUM!	#NUM!	#NUM!	0				#NUM!	#NUM!	#DIV/0!	#NUM!		#NUM!	#NUM!
									#NUM!	#NUM!	#NUM!	#NUM!	#NUM!	0				#NUM!	#NUM!	#DIV/0!	#NUM!		#NUM!	#NUM!
									#NUM!	#NUM!	#NUM!	#NUM!	#NUM!	0				#NUM!	#NUM!	#DIV/0!	#NUM!		#NUM!	#NUM!
									#NUM!	#NUM!	#NUM!	#NUM!	#NUM!	0				#NUM!	#NUM!	#DIV/0!	#NUM!		#NUM!	#NUM!
									#NUM!	#NUM!	#NUM!	#NUM!	#NUM!	0				#NUM!	#NUM!	#DIV/0!	#NUM!		#NUM!	#NUM!
									#NUM!	#NUM!	#NUM!	#NUM!	#NUM!	0				#NUM!	#NUM!	#DIV/0!	#NUM!		#NUM!	#NUM!
									#NUM!	#NUM!	#NUM!	#NUM!	#NUM!	0				#NUM!	#NUM!	#DIV/0!	#NUM!		#NUM!	#NUM!
									#NUM!	#NUM!	#NUM!	#NUM!	#NUM!	0				#NUM!	#NUM!	#DIV/0!	#NUM!		#NUM!	#NUM!
									#NUM!	#NUM!	#NUM!	#NUM!	#NUM!	0				#NUM!	#NUM!	#DIV/0!	#NUM!		#NUM!	#NUM!
									#NUM!	#NUM!	#NUM!	#NUM!	#NUM!	0				#NUM!	#NUM!	#DIV/0!	#NUM!		#NUM!	#NUM!
									#NUM!	#NUM!	#NUM!	#NUM!	#NUM!	0				#NUM!	#NUM!	#DIV/0!	#NUM!		#NUM!	#NUM!
									#NUM!	#NUM!	#NUM!	#NUM!	#NUM!	0				#NUM!	#NUM!	#DIV/0!	#NUM!		#NUM!	#NUM!
									#NUM!	#NUM!	#NUM!	#NUM!	#NUM!	0				#NUM!	#NUM!	#DIV/0!	#NUM!		#NUM!	#NUM!
									#NUM!	#NUM!	#NUM!	#NUM!	#NUM!	0				#NUM!	#NUM!	#DIV/0!	#NUM!		#NUM!	#NUM!
									#NUM!	#NUM!	#NUM!	#NUM!	#NUM!	0				#NUM!	#NUM!	#DIV/0!	#NUM!		#NUM!	#NUM!
									#NUM!	#NUM!	#NUM!	#NUM!	#NUM!	0				#NUM!	#NUM!	#DIV/0!	#NUM!		#NUM!	#NUM!
									#NUM!	#NUM!	#NUM!	#NUM!	#NUM!	0				#NUM!	#NUM!	#DIV/0!	#NUM!		#NUM!	#NUM!
									#NUM!	#NUM!	#NUM!	#NUM!	#NUM!	0				#NUM!	#NUM!	#DIV/0!	#NUM!		#NUM!	#NUM!
									#NUM!	#NUM!	#NUM!	#NUM!	#NUM!	0				#NUM!	#NUM!	#DIV/0!	#NUM!		#NUM!	#NUM!
									#NUM!	#NUM!	#NUM!	#NUM!	#NUM!	0				#NUM!	#NUM!	#DIV/0!	#NUM!		#NUM!	#NUM!
									#NUM!	#NUM!	#NUM!	#NUM!	#NUM!	0				#NUM!	#NUM!	#DIV/0!	#NUM!		#NUM!	#NUM!
									#NUM!	#NUM!	#NUM!	#NUM!	#NUM!	0				#NUM!	#NUM!	#DIV/0!	#NUM!		#NUM!	#NUM!
									#NUM!	#NUM!	#NUM!	#NUM!	#NUM!	0				#NUM!	#NUM!	#DIV/0!	#NUM!		#NUM!	#NUM!
									#NUM!	#NUM!	#NUM!	#NUM!	#NUM!	0				#NUM!	#NUM!	#DIV/0!	#NUM!		#NUM!	#NUM!
									#NUM!	#NUM!	#NUM!	#NUM!	#NUM!	0				#NUM!	#NUM!	#DIV/0!	#NUM!		#NUM!	#NUM!
									#NUM!	#NUM!	#NUM!	#NUM!	#NUM!	0				#NUM!	#NUM!	#DIV/0!	#NUM!		#NUM!	#NUM!
									#NUM!	#NUM!	#NUM!	#NUM!	#NUM!	0				#NUM!	#NUM!	#DIV/0!	#NUM!		#NUM!	#NUM!
									#NUM!	#NUM!	#NUM!	#NUM!	#NUM!	0				#NUM!	#NUM!	#DIV/0!	#NUM!		#NUM!	#NUM!
									#NUM!	#NUM!	#NUM!	#NUM!	#NUM!	0				#NUM!	#NUM!	#DIV/0!	#NUM!		#NUM!	#NUM!
									#NUM!	#NUM!	#NUM!	#NUM!	#NUM!	0				#NUM!	#NUM!	#DIV/0!	#NUM!		#NUM!	#NUM!
									#NUM!	#NUM!	#NUM!	#NUM!	#NUM!	0				#NUM!	#NUM!	#DIV/0!	#NUM!		#NUM!	#NUM!
									#NUM!	#NUM!	#NUM!	#NUM!	#NUM!	0				#NUM!	#NUM!	#DIV/0!	#NUM!		#NUM!	#NUM!
									#NUM!	#NUM!	#NUM!	#NUM!	#NUM!	0				#NUM!	#NUM!	#DIV/0!	#NUM!		#NUM!	#NUM!
									#NUM!	#NUM!	#NUM!	#NUM!	#NUM!	0				#NUM!	#NUM!	#DIV/0!	#NUM!		#NUM!	#NUM!
									#NUM!	#NUM!	#NUM!	#NUM!	#NUM!	0				#NUM!	#NUM!	#DIV/0!	#NUM!		#NUM!	#NUM!
									#NUM!	#NUM!	#NUM!	#NUM!	#NUM!	0				#NUM!	#NUM!	#DIV/0!	#NUM!		#NUM!	#NUM!
									#NUM!	#NUM!	#NUM!	#NUM!	#NUM!	0				#NUM!	#NUM!	#DIV/0!	#NUM!		#NUM!	#NUM!
									#NUM!	#NUM!	#NUM!	#NUM!	#NUM!	0				#NUM!	#NUM!	#DIV/0!	#NUM!		#NUM!	#NUM!
									#NUM!	#NUM!	#NUM!	#NUM!	#NUM!	0				#NUM!	#NUM!	#DIV/0!	#NUM!		#NUM!	#NUM!
									#NUM!	#NUM!	#NUM!	#NUM!	#NUM!	0				#NUM!	#NUM!	#DIV/0!	#NUM!		#NUM!	#NUM!
									#NUM!	#NUM!	#NUM!	#NUM!	#NUM!	0				#NUM!	#NUM!	#DIV/0!	#NUM!		#NUM!	#NUM!
									#NUM!	#NUM!	#NUM!	#NUM!	#NUM!	0				#NUM!	#NUM!	#DIV/0!	#NUM!		#NUM!	#NUM!
									#NUM!	#NUM!	#NUM!	#NUM!	#NUM!	0				#NUM!	#NUM!	#DIV/0!	#NUM!		#NUM!	#NUM!
									#NUM!	#NUM!	#NUM!	#NUM!	#NUM!	0				#NUM!	#NUM!	#DIV/0!	#NUM!		#NUM!	#NUM!
									#NUM!	#NUM!	#NUM!	#NUM!	#NUM!	0				#NUM!	#NUM!	#DIV/0!	#NUM!		#NUM!	#NUM!
									#NUM!	#NUM!	#NUM!	#NUM!	#NUM!	0				#NUM!	#NUM!	#DIV/0!	#NUM!		#NUM!	#NUM!
									#NUM!	#NUM!	#NUM!	#NUM!	#NUM!	0				#NUM!	#NUM!	#DIV/0!	#NUM!		#NUM!	#NUM!
									#NUM!	#NUM!	#NUM!	#NUM!	#NUM!	0				#NUM!	#NUM!	#DIV/0!	#NUM!		#NUM!	#NUM!
									#NUM!	#NUM!	#NUM!	#NUM!	#NUM!	0				#NUM!	#NUM!	#DIV/0!	#NUM!		#NUM!	#NUM!
									#NUM!	#NUM!	#NUM!	#NUM!	#NUM!	0				#NUM!	#NUM!	#DIV/0!	#NUM!		#NUM!	#NUM!
									#NUM!	#NUM!	#NUM!	#NUM!	#NUM!	0				#NUM!	#NUM!	#DIV/0!	#NUM!		#NUM!	#NUM!
									#NUM!	#NUM!	#NUM!	#NUM!	#NUM!	0				#NUM!	#NUM!	#DIV/0!	#NUM!		#NUM!	#NUM!
									#NUM!	#NUM!	#NUM!	#NUM!	#NUM!	0				#NUM!	#NUM!	#DIV/0!	#NUM!		#NUM!	#NUM!
									#NUM!	#NUM!	#NUM!	#NUM!	#NUM!	0				#NUM!	#NUM!	#DIV/0!	#NUM!		#NUM!	#NUM!
									#NUM!	#NUM!	#NUM!	#NUM!	#NUM!	0				#NUM!	#NUM!	#DIV/0!	#NUM!		#NUM!	#NUM!
									#NUM!	#NUM!	#NUM!	#NUM!	#NUM!	0				#NUM!	#NUM!	#DIV/0!	#NUM!		#NUM!	#NUM!
									#NUM!	#NUM!	#NUM!	#NUM!	#NUM!	0				#NUM!	#NUM!	#DIV/0!	#NUM!		#NUM!	#NUM!
									#NUM!	#NUM!	#NUM!	#NUM!	#NUM!	0				#NUM!	#NUM!	#DIV/0!	#NUM!		#NUM!	#NUM!
									#NUM!	#NUM!	#NUM!	#NUM!	#NUM!	0				#NUM!	#NUM!	#DIV/0!	#NUM!		#NUM!	#NUM!
									#NUM!	#NUM!	#NUM!	#NUM!	#NUM!	0				#NUM!	#NUM!	#DIV/0!	#NUM!		#NUM!	#NUM!
									#NUM!	#NUM!	#NUM!	#NUM!	#NUM!	0				#NUM!	#NUM!	#DIV/0!	#NUM!		#NUM!	#NUM!
									#NUM!	#NUM!	#NUM!	#NUM!	#NUM!	0				#NUM!	#NUM!	#DIV/0!	#NUM!		#NUM!	#NUM!
									#NUM!	#NUM!	#NUM!	#NUM!	#NUM!	0				#NUM!	#NUM!	#DIV/0!	#NUM!		#NUM!	#NUM!
									#NUM!	#NUM!	#NUM!	#NUM!	#NUM!	0				#NUM!	#NUM!	#DIV/0!	#NUM!		#NUM!	#NUM!
									#NUM!	#NUM!	#NUM!	#NUM!	#NUM!	0				#NUM!	#NUM!	#DIV/0!	#NUM!		#NUM!	#NUM!
									#NUM!	#NUM!	#NUM!	#NUM!	#NUM!	0				#NUM!	#NUM!	#DIV/0!	#NUM!		#NUM!	#NUM!
									#NUM!	#NUM!	#NUM!	#NUM!	#NUM!	0				#NUM!	#NUM!	#DIV/0!	#NUM!		#NUM!	#NUM!
									#NUM!	#NUM!	#NUM!	#NUM!	#NUM!	0				#NUM!	#NUM!	#DIV/0!	#NUM!		#NUM!	#NUM!
									#NUM!	#NUM!	#NUM!	#NUM!	#NUM!	0				#NUM!	#NUM!	#DIV/0!	#NUM!		#NUM!	#NUM!
									#NUM!	#NUM!	#NUM!	#NUM!	#NUM!	0				#NUM!	#NUM!	#DIV/0!	#NUM!		#NUM!	#NUM!
									#NUM!	#NUM!	#NUM!	#NUM!	#NUM!	0				#NUM!	#NUM!	#DIV/0!	#NUM!		#NUM!	#NUM!
									#NUM!	#NUM!	#NUM!	#NUM!	#NUM!	0				#NUM!	#NUM!	#DIV/0!	#NUM!		#NUM!	#NUM!
									#NUM!	#NUM!	#NUM!	#NUM!	#NUM!	0				#NUM!	#NUM!	#DIV/0!	#NUM!		#NUM!	#NUM!
									#NUM!	#NUM!	#NUM!	#NUM!	#NUM!	0				#NUM!	#NUM!	#DIV/0!	#NUM!		#NUM!	#NUM!
									#NUM!	#NUM!	#NUM!	#NUM!	#NUM!	0				#NUM!	#NUM!	#DIV/0!	#NUM!		#NUM!	#NUM!
									#NUM!	#NUM!	#NUM!	#NUM!	#NUM!	0				#NUM!	#NUM!	#DIV/0!	#NUM!		#NUM!	#NUM!
									#NUM!	#NUM!	#NUM!	#NUM!	#NUM!	0				#NUM!	#NUM!	#DIV/0!	#NUM!		#NUM!	#NUM!
									#NUM!	#NUM!	#NUM!	#NUM!	#NUM!	0				#NUM!	#NUM!	#DIV/0!	#NUM!		#NUM!	#NUM!
									#NUM!	#NUM!	#NUM!	#NUM!	#NUM!	0				#NUM!	#NUM!	#DIV/0!	#NUM!		#NUM!	#NUM!
									#NUM!	#NUM!	#NUM!	#NUM!	#NUM!	0				#NUM!	#NUM!	#DIV/0!	#NUM!		#NUM!	#NUM!
									#NUM!	#NUM!	#NUM!	#NUM!	#NUM!	0				#NUM!	#NUM!	#DIV/0!	#NUM!		#NUM!	#NUM!
									#NUM!	#NUM!	#NUM!	#NUM!	#NUM!	0				#NUM!	#NUM!	#DIV/0!	#NUM!		#NUM!	#NUM!
									#NUM!	#NUM!	#NUM!	#NUM!	#NUM!	0				#NUM!	#NUM!	#DIV/0!	#NUM!		#NUM!	#NUM!
									#NUM!	#NUM!	#NUM!	#NUM!	#NUM!	0				#NUM!	#NUM!	#DIV/0!	#NUM!		#NUM!	#NUM!
									#NUM!	#NUM!	#NUM!	#NUM!	#NUM!	0				#NUM!	#NUM!	#DIV/0!	#NUM!		#NUM!	#NUM!
									#NUM!	#NUM!	#NUM!	#NUM!	#NUM!	0				#NUM!	#NUM!	#DIV/0!	#NUM!		#NUM!	#NUM!
									#NUM!	#NUM!	#NUM!	#NUM!	#NUM!	0				#NUM!	#NUM!	#DIV/0!	#NUM!		#NUM!	#NUM!
									#NUM!	#NUM!	#NUM!	#NUM!	#NUM!	0				#NUM!	#NUM!	#DIV/0!	#NUM!		#NUM!	#NUM!
									#NUM!	#NUM!	#NUM!	#NUM!	#NUM!	0				#NUM!	#NUM!	#DIV/0!	#NUM!		#NUM!	#NUM!
									#NUM!	#NUM!	#NUM!	#NUM!	#NUM!	0				#NUM!	#NUM!	#DIV/0!	#NUM!		#NUM!	#NUM!
									#NUM!	#NUM!	#NUM!	#NUM!	#NUM!	0				#NUM!	#NUM!	#DIV/0!	#NUM!		#NUM!	#NUM!
									#NUM!	#NUM!	#NUM!	#NUM!	#NUM!	0				#NUM!	#NUM!	#DIV/0!	#NUM!		#NUM!	#NUM!
									#NUM!	#NUM!	#NUM!	#NUM!	#NUM!	0				#NUM!	#NUM!	#DIV/0!	#NUM!		#NUM!	#NUM!
									#NUM!	#NUM!	#NUM!	#NUM!	#NUM!	0				#NUM!	#NUM!	#DIV/0!	#NUM!		#NUM!	#NUM!
									#NUM!	#NUM!	#NUM!	#NUM!	#NUM!	0				#NUM!	#NUM!	#DIV/0!	#NUM!		#NUM!	#NUM!
									#NUM!	#NUM!	#NUM!	#NUM!	#NUM!	0				#NUM!	#NUM!	#DIV/0!	#NUM!		#NUM!	#NUM!
									#NUM!	#NUM!	#NUM!	#NUM!	#NUM!	0				#NUM!	#NUM!	#DIV/0!	#NUM!		#NUM!	#NUM!
									#NUM!	#NUM!	#NUM!	#NUM!	#NUM!	0				#NUM!	#NUM!	#DIV/0!	#NUM!		#NUM!	#NUM!
									#NUM!	#NUM!	#NUM!	#NUM!	#NUM!	0				#NUM!	#NUM!	#DIV/0!	#NUM!		#NUM!	#NUM!
									#NUM!	#NUM!	#NUM!	#NUM!	#NUM!	0				#NUM!	#NUM!	#DIV/0!	#NUM!		#NUM!	#NUM!
									#NUM!	#NUM!	#NUM!	#NUM!	#NUM!	0				#NUM!	#NUM!	#DIV/0!	#NUM!		#NUM!	#NUM!
									#NUM!	#NUM!	#NUM!	#NUM!	#NUM!	0				#NUM!	#NUM!	#DIV/0!	#NUM!		#NUM!	#NUM!
									#NUM!	#NUM!	#NUM!	#NUM!	#NUM!	0				#NUM!	#NUM!	#DIV/0!	#NUM!		#NUM!	#NUM!
									#NUM!	#NUM!	#NUM!	#NUM!	#NUM!	0				#NUM!	#NUM!	#DIV/0!	#NUM!		#NUM!	#NUM!
									#NUM!	#NUM!	#NUM!	#NUM!	#NUM!	0				#NUM!	#NUM!	#DIV/0!	#NUM!		#NUM!	#NUM!
									#NUM!	#NUM!	#NUM!	#NUM!	#NUM!	0				#NUM!	#NUM!	#DIV/0!	#NUM!		#NUM!	#NUM!
									#NUM!	#NUM!	#NUM!	#NUM!	#NUM!	0				#NUM!	#NUM!	#DIV/0!	#NUM!		#NUM!	#NUM!
									#NUM!	#NUM!	#NUM!	#NUM!	#NUM!	0				#NUM!	#NUM!	#DIV/0!	#NUM!		#NUM!	#NUM!
									#NUM!	#NUM!	#NUM!	#NUM!	#NUM!	0				#NUM!	#NUM!	#DIV/0!	#NUM!		#NUM!	#NUM!
									#NUM!	#NUM!	#NUM!	#NUM!	#NUM!	0				#NUM!	#NUM!	#DIV/0!	#NUM!		#NUM!	#NUM!
									#NUM!	#NUM!	#NUM!	#NUM!	#NUM!	0				#NUM!	#NUM!	#DIV/0!	#NUM!		#NUM!	#NUM!
									#NUM!	#NUM!	#NUM!	#NUM!	#NUM!	0				#NUM!	#NUM!	#DIV/0!	#NUM!		#NUM!	#NUM!
									#NUM!	#NUM!	#NUM!	#NUM!	#NUM!	0				#NUM!	#NUM!	#DIV/0!	#NUM!		#NUM!	#NUM!
									#NUM!	#NUM!	#NUM!	#NUM!	#NUM!	0				#NUM!	#NUM!	#DIV/0!	#NUM!		#NUM!	#NUM!
									#NUM!	#NUM!	#NUM!	#NUM!	#NUM!	0				#NUM!	#NUM!	#DIV/0!	#NUM!		#NUM!	#NUM!
									#NUM!	#NUM!	#NUM!	#NUM!	#NUM!	0				#NUM!	#NUM!	#DIV/0!	#NUM!		#NUM!	#NUM!
									#NUM!	#NUM!	#NUM!	#NUM!	#NUM!	0				#NUM!	#NUM!	#DIV/0!	#NUM!		#NUM!	#NUM!
									#NUM!	#NUM!	#NUM!	#NUM!	#NUM!	0				#NUM!	#NUM!	#DIV/0!	#NUM!		#NUM!	#NUM!
									#NUM!	#NUM!	#NUM!	#NUM!	#NUM!	0				#NUM!	#NUM!	#DIV/0!	#NUM!		#NUM!	#NUM!
									#NUM!	#NUM!	#NUM!	#NUM!	#NUM!	0				#NUM!	#NUM!	#DIV/0!	#NUM!		#NUM!	#NUM!
									#NUM!	#NUM!	#NUM!	#NUM!	#NUM!	0				#NUM!	#NUM!	#DIV/0!	#NUM!		#NUM!	#NUM!
									#NUM!	#NUM!	#NUM!	#NUM!	#NUM!	0				#NUM!	#NUM!	#DIV/0!	#NUM!		#NUM!	#NUM!
									#NUM!	#NUM!	#NUM!	#NUM!	#NUM!	0				#NUM!	#NUM!	#DIV/0!	#NUM!		#NUM!	#NUM!
									#NUM!	#NUM!	#NUM!	#NUM!	#NUM!	0				#NUM!	#NUM!	#DIV/0!	#NUM!		#NUM!	#NUM!
									#NUM!	#NUM!	#NUM!	#NUM!	#NUM!	0				#NUM!	#NUM!	#DIV/0!	#NUM!		#NUM!	#NUM!
									#NUM!	#NUM!	#NUM!	#NUM!	#NUM!	0				#NUM!	#NUM!	#DIV/0!	#NUM!		#NUM!	#NUM!
									#NUM!	#NUM!	#NUM!	#NUM!	#NUM!	0				#NUM!	#NUM!	#DIV/0!	#NUM!		#NUM!	#NUM!
									#NUM!	#NUM!	#NUM!	#NUM!	#NUM!	0				#NUM!	#NUM!	#DIV/0!	#NUM!		#NUM!	#NUM!
									#NUM!	#NUM!	#NUM!	#NUM!	#NUM!	0				#NUM!	#NUM!	#DIV/0!	#NUM!		#NUM!	#NUM!
									#NUM!	#NUM!	#NUM!	#NUM!	#NUM!	0				#NUM!	#NUM!	#DIV/0!	#NUM!		#NUM!	#NUM!
									#NUM!	#NUM!	#NUM!	#NUM!	#NUM!	0				#NUM!	#NUM!	#DIV/0!	#NUM!		#NUM!	#NUM!
									#NUM!	#NUM!	#NUM!	#NUM!	#NUM!	0				#NUM!	#NUM!	#DIV/0!	#NUM!		#NUM!	#NUM!
									#NUM!	#NUM!	#NUM!	#NUM!	#NUM!	0				#NUM!	#NUM!	#DIV/0!	#NUM!		#NUM!	#NUM!
									#NUM!	#NUM!	#NUM!	#NUM!	#NUM!	0				#NUM!	#NUM!	#DIV/0!	#NUM!		#NUM!	#NUM!
									#NUM!	#NUM!	#NUM!	#NUM!	#NUM!	0				#NUM!	#NUM!	#DIV/0!	#NUM!		#NUM!	#NUM!
									#NUM!	#NUM!	#NUM!	#NUM!	#NUM!	0				#NUM!	#NUM!	#DIV/0!	#NUM!		#NUM!	#NUM!
									#NUM!	#NUM!	#NUM!	#NUM!	#NUM!	0				#NUM!	#NUM!	#DIV/0!	#NUM!		#NUM!	#NUM!
									#NUM!	#NUM!	#NUM!	#NUM!	#NUM!	0				#NUM!	#NUM!	#DIV/0!	#NUM!		#NUM!	#NUM!
									#NUM!	#NUM!	#NUM!	#NUM!	#NUM!	0				#NUM!	#NUM!	#DIV/0!	#NUM!		#NUM!	#NUM!
									#NUM!	#NUM!	#NUM!	#NUM!	#NUM!	0				#NUM!	#NUM!	#DIV/0!	#NUM!		#NUM!	#NUM!
									#NUM!	#NUM!	#NUM!	#NUM!	#NUM!	0				#NUM!	#NUM!	#DIV/0!	#NUM!		#NUM!	#NUM!
									#NUM!	#NUM!	#NUM!	#NUM!	#NUM!	0				#NUM!	#NUM!	#DIV/0!	#NUM!		#NUM!	#NUM!
									#NUM!	#NUM!	#NUM!	#NUM!	#NUM!	0				#NUM!	#NUM!	#DIV/0!	#NUM!		#NUM!	#NUM!
									#NUM!	#NUM!	#NUM!	#NUM!	#NUM!	0				#NUM!	#NUM!	#DIV/0!	#NUM!		#NUM!	#NUM!
									#NUM!	#NUM!	#NUM!	#NUM!	#NUM!	0				#NUM!	#NUM!	#DIV/0!	#NUM!		#NUM!	#NUM!
									#NUM!	#NUM!	#NUM!	#NUM!	#NUM!	0				#NUM!	#NUM!	#DIV/0!	#NUM!		#NUM!	#NUM!
									#NUM!	#NUM!	#NUM!	#NUM!	#NUM!	0				#NUM!	#NUM!	#DIV/0!	#NUM!		#NUM!	#NUM!
									#NUM!	#NUM!	#NUM!	#NUM!	#NUM!	0				#NUM!	#NUM!	#DIV/0!	#NUM!		#NUM!	#NUM!
									#NUM!	#NUM!	#NUM!	#NUM!	#NUM!	0				#NUM!	#NUM!	#DIV/0!	#NUM!		#NUM!	#NUM!
									#NUM!	#NUM!	#NUM!	#NUM!	#NUM!	0				#NUM!	#NUM!	#DIV/0!	#NUM!		#NUM!	#NUM!
									#NUM!	#NUM!	#NUM!	#NUM!	#NUM!	0				#NUM!	#NUM!	#DIV/0!	#NUM!		#NUM!	#NUM!
									#NUM!	#NUM!	#NUM!	#NUM!	#NUM!	0				#NUM!	#NUM!	#DIV/0!	#NUM!		#NUM!	#NUM!
									#NUM!	#NUM!	#NUM!	#NUM!	#NUM!	0				#NUM!	#NUM!	#DIV/0!	#NUM!		#NUM!	#NUM!
									#NUM!	#NUM!	#NUM!	#NUM!	#NUM!	0				#NUM!	#NUM!	#DIV/0!	#NUM!		#NUM!	#NUM!
									#NUM!	#NUM!	#NUM!	#NUM!	#NUM!	0				#NUM!	#NUM!	#DIV/0!	#NUM!		#NUM!	#NUM!
									#NUM!	#NUM!	#NUM!	#NUM!	#NUM!	0				#NUM!	#NUM!	#DIV/0!	#NUM!		#NUM!	#NUM!
									#NUM!	#NUM!	#NUM!	#NUM!	#NUM!	0				#NUM!	#NUM!	#DIV/0!	#NUM!		#NUM!	#NUM!
									#NUM!	#NUM!	#NUM!	#NUM!	#NUM!	0				#NUM!	#NUM!	#DIV/0!	#NUM!		#NUM!	#NUM!
									#NUM!	#NUM!	#NUM!	#NUM!	#NUM!	0				#NUM!	#NUM!	#DIV/0!	#NUM!		#NUM!	#NUM!
									#NUM!	#NUM!	#NUM!	#NUM!	#NUM!	0				#NUM!	#NUM!	#DIV/0!	#NUM!		#NUM!	#NUM!
									#NUM!	#NUM!	#NUM!	#NUM!	#NUM!	0				#NUM!	#NUM!	#DIV/0!	#NUM!		#NUM!	#NUM!
									#NUM!	#NUM!	#NUM!	#NUM!	#NUM!	0				#NUM!	#NUM!	#DIV/0!	#NUM!		#NUM!	#NUM!
									#NUM!	#NUM!	#NUM!	#NUM!	#NUM!	0				#NUM!	#NUM!	#DIV/0!	#NUM!		#NUM!	#NUM!
									#NUM!	#NUM!	#NUM!	#NUM!	#NUM!	0				#NUM!	#NUM!	#DIV/0!	#NUM!		#NUM!	#NUM!
									#NUM!	#NUM!	#NUM!	#NUM!	#NUM!	0				#NUM!	#NUM!	#DIV/0!	#NUM!		#NUM!	#NUM!
									#NUM!	#NUM!	#NUM!	#NUM!	#NUM!	0				#NUM!	#NUM!	#DIV/0!	#NUM!		#NUM!	#NUM!
									#NUM!	#NUM!	#NUM!	#NUM!	#NUM!	0				#NUM!	#NUM!	#DIV/0!	#NUM!		#NUM!	#NUM!
									#NUM!	#NUM!	#NUM!	#NUM!	#NUM!	0				#NUM!	#NUM!	#DIV/0!	#NUM!		#NUM!	#NUM!
									#NUM!	#NUM!	#NUM!	#NUM!	#NUM!	0				#NUM!	#NUM!	#DIV/0!	#NUM!		#NUM!	#NUM!
									#NUM!	#NUM!	#NUM!	#NUM!	#NUM!	0				#NUM!	#NUM!	#DIV/0!	#NUM!		#NUM!	#NUM!
									#NUM!	#NUM!	#NUM!	#NUM!	#NUM!	0				#NUM!	#NUM!	#DIV/0!	#NUM!		#NUM!	#NUM!
									#NUM!	#NUM!	#NUM!	#NUM!	#NUM!	0				#NUM!	#NUM!	#DIV/0!	#NUM!		#NUM!	#NUM!
									#NUM!	#NUM!	#NUM!	#NUM!	#NUM!	0				#NUM!	#NUM!	#DIV/0!	#NUM!		#NUM!	#NUM!
									#NUM!	#NUM!	#NUM!	#NUM!	#NUM!	0				#NUM!	#NUM!	#DIV/0!	#NUM!		#NUM!	#NUM!
									#NUM!	#NUM!	#NUM!	#NUM!	#NUM!	0				#NUM!	#NUM!	#DIV/0!	#NUM!		#NUM!	#NUM!
									#NUM!	#NUM!	#NUM!	#NUM!	#NUM!	0				#NUM!	#NUM!	#DIV/0!	#NUM!		#NUM!	#NUM!
									#NUM!	#NUM!	#NUM!	#NUM!	#NUM!	0				#NUM!	#NUM!	#DIV/0!	#NUM!		#NUM!	#NUM!
									#NUM!	#NUM!	#NUM!	#NUM!	#NUM!	0				#NUM!	#NUM!	#DIV/0!	#NUM!		#NUM!	#NUM!
									#NUM!	#NUM!	#NUM!	#NUM!	#NUM!	0				#NUM!	#NUM!	#DIV/0!	#NUM!		#NUM!	#NUM!
									#NUM!	#NUM!	#NUM!	#NUM!	#NUM!	0				#NUM!	#NUM!	#DIV/0!	#NUM!		#NUM!	#NUM!
									#NUM!	#NUM!	#NUM!	#NUM!	#NUM!	0				#NUM!	#NUM!	#DIV/0!	#NUM!		#NUM!	#NUM!
									#NUM!	#NUM!	#NUM!	#NUM!	#NUM!	0				#NUM!	#NUM!	#DIV/0!	#NUM!		#NUM!	#NUM!
									#NUM!	#NUM!	#NUM!	#NUM!	#NUM!	0				#NUM!	#NUM!	#DIV/0!	#NUM!		#NUM!	#NUM!
									#NUM!	#NUM!	#NUM!	#NUM!	#NUM!	0				#NUM!	#NUM!	#DIV/0!	#NUM!		#NUM!	#NUM!
									#NUM!	#NUM!	#NUM!	#NUM!	#NUM!	0				#NUM!	#NUM!	#DIV/0!	#NUM!		#NUM!	#NUM!
									#NUM!	#NUM!	#NUM!	#NUM!	#NUM!	0				#NUM!	#NUM!	#DIV/0!	#NUM!		#NUM!	#NUM!
									#NUM!	#NUM!	#NUM!	#NUM!	#NUM!	0				#NUM!	#NUM!	#DIV/0!	#NUM!		#NUM!	#NUM!
									#NUM!	#NUM!	#NUM!	#NUM!	#NUM!	0				#NUM!	#NUM!	#DIV/0!	#NUM!		#NUM!	#NUM!
									#NUM!	#NUM!	#NUM!	#NUM!	#NUM!	0				#NUM!	#NUM!	#DIV/0!	#NUM!		#NUM!	#NUM!
									#NUM!	#NUM!	#NUM!	#NUM!	#NUM!	0				#NUM!	#NUM!	#DIV/0!	#NUM!		#NUM!	#NUM!
									#NUM!	#NUM!	#NUM!	#NUM!	#NUM!	0				#NUM!	#NUM!	#DIV/0!	#NUM!		#NUM!	#NUM!
									#NUM!	#NUM!	#NUM!	#NUM!	#NUM!	0				#NUM!	#NUM!	#DIV/0!	#NUM!		#NUM!	#NUM!
									#NUM!	#NUM!	#NUM!	#NUM!	#NUM!	0				#NUM!	#NUM!	#DIV/0!	#NUM!		#NUM!	#NUM!
									#NUM!	#NUM!	#NUM!	#NUM!	#NUM!	0				#NUM!	#NUM!	#DIV/0!	#NUM!		#NUM!	#NUM!
									#NUM!	#NUM!	#NUM!	#NUM!	#NUM!	0				#NUM!	#NUM!	#DIV/0!	#NUM!		#NUM!	#NUM!
									#NUM!	#NUM!	#NUM!	#NUM!	#NUM!	0				#NUM!	#NUM!	#DIV/0!	#NUM!		#NUM!	#NUM!
									#NUM!	#NUM!	#NUM!	#NUM!	#NUM!	0				#NUM!	#NUM!	#DIV/0!	#NUM!		#NUM!	#NUM!
									#NUM!	#NUM!	#NUM!	#NUM!	#NUM!	0				#NUM!	#NUM!	#DIV/0!	#NUM!		#NUM!	#NUM!
									#NUM!	#NUM!	#NUM!	#NUM!	#NUM!	0				#NUM!	#NUM!	#DIV/0!	#NUM!		#NUM!	#NUM!
									#NUM!	#NUM!	#NUM!	#NUM!	#NUM!	0				#NUM!	#NUM!	#DIV/0!	#NUM!		#NUM!	#NUM!
									#NUM!	#NUM!	#NUM!	#NUM!	#NUM!	0				#NUM!	#NUM!	#DIV/0!	#NUM!		#NUM!	#NUM!
									#NUM!	#NUM!	#NUM!	#NUM!	#NUM!	0				#NUM!	#NUM!	#DIV/0!	#NUM!		#NUM!	#NUM!
									#NUM!	#NUM!	#NUM!	#NUM!	#NUM!	0				#NUM!	#NUM!	#DIV/0!	#NUM!		#NUM!	#NUM!
									#NUM!	#NUM!	#NUM!	#NUM!	#NUM!	0				#NUM!	#NUM!	#DIV/0!	#NUM!		#NUM!	#NUM!
									#NUM!	#NUM!	#NUM!	#NUM!	#NUM!	0				#NUM!	#NUM!	#DIV/0!	#NUM!		#NUM!	#NUM!
									#NUM!	#NUM!	#NUM!	#NUM!	#NUM!	0				#NUM!	#NUM!	#DIV/0!	#NUM!		#NUM!	#NUM!
									#NUM!	#NUM!	#NUM!	#NUM!	#NUM!	0				#NUM!	#NUM!	#DIV/0!	#NUM!		#NUM!	#NUM!
									#NUM!	#NUM!	#NUM!	#NUM!	#NUM!	0				#NUM!	#NUM!	#DIV/0!	#NUM!		#NUM!	#NUM!
									#NUM!	#NUM!	#NUM!	#NUM!	#NUM!	0				#NUM!	#NUM!	#DIV/0!	#NUM!		#NUM!	#NUM!
									#NUM!	#NUM!	#NUM!	#NUM!	#NUM!	0				#NUM!	#NUM!	#DIV/0!	#NUM!		#NUM!	#NUM!
									#NUM!	#NUM!	#NUM!	#NUM!	#NUM!	0				#NUM!	#NUM!	#DIV/0!	#NUM!		#NUM!	#NUM!
									#NUM!	#NUM!	#NUM!	#NUM!	#NUM!	0				#NUM!	#NUM!	#DIV/0!	#NUM!		#NUM!	#NUM!
									#NUM!	#NUM!	#NUM!	#NUM!	#NUM!	0				#NUM!	#NUM!	#DIV/0!	#NUM!		#NUM!	#NUM!
									#NUM!	#NUM!	#NUM!	#NUM!	#NUM!	0				#NUM!	#NUM!	#DIV/0!	#NUM!		#NUM!	#NUM!
									#NUM!	#NUM!	#NUM!	#NUM!	#NUM!	0				#NUM!	#NUM!	#DIV/0!	#NUM!		#NUM!	#NUM!
									#NUM!	#NUM!	#NUM!	#NUM!	#NUM!	0				#NUM!	#NUM!	#DIV/0!	#NUM!		#NUM!	#NUM!
									#NUM!	#NUM!	#NUM!	#NUM!	#NUM!	0				#NUM!	#NUM!	#DIV/0!	#NUM!		#NUM!	#NUM!
									#NUM!	#NUM!	#NUM!	#NUM!	#NUM!	0				#NUM!	#NUM!	#DIV/0!	#NUM!		#NUM!	#NUM!
									#NUM!	#NUM!	#NUM!	#NUM!	#NUM!	0				#NUM!	#NUM!	#DIV/0!	#NUM!		#NUM!	#NUM!
									#NUM!	#NUM!	#NUM!	#NUM!	#NUM!	0				#NUM!	#NUM!	#DIV/0!	#NUM!		#NUM!	#NUM!
									#NUM!	#NUM!	#NUM!	#NUM!	#NUM!	0				#NUM!	#NUM!	#DIV/0!	#NUM!		#NUM!	#NUM!
									#NUM!	#NUM!	#NUM!	#NUM!	#NUM!	0				#NUM!	#NUM!	#DIV/0!	#NUM!		#NUM!	#NUM!
									#NUM!	#NUM!	#NUM!	#NUM!	#NUM!	0				#NUM!	#NUM!	#DIV/0!	#NUM!		#NUM!	#NUM!
									#NUM!	#NUM!	#NUM!	#NUM!	#NUM!	0				#NUM!	#NUM!	#DIV/0!	#NUM!		#NUM!	#NUM!
									#NUM!	#NUM!	#NUM!	#NUM!	#NUM!	0				#NUM!	#NUM!	#DIV/0!	#NUM!		#NUM!	#NUM!
									#NUM!	#NUM!	#NUM!	#NUM!	#NUM!	0				#NUM!	#NUM!	#DIV/0!	#NUM!		#NUM!	#NUM!
									#NUM!	#NUM!	#NUM!	#NUM!	#NUM!	0				#NUM!	#NUM!	#DIV/0!	#NUM!		#NUM!	#NUM!
									#NUM!	#NUM!	#NUM!	#NUM!	#NUM!	0				#NUM!	#NUM!	#DIV/0!	#NUM!		#NUM!	#NUM!
									#NUM!	#NUM!	#NUM!	#NUM!	#NUM!	0				#NUM!	#NUM!	#DIV/0!	#NUM!		#NUM!	#NUM!
									#NUM!	#NUM!	#NUM!	#NUM!	#NUM!	0				#NUM!	#NUM!	#DIV/0!	#NUM!		#NUM!	#NUM!
									#NUM!	#NUM!	#NUM!	#NUM!	#NUM!	0				#NUM!	#NUM!	#DIV/0!	#NUM!		#NUM!	#NUM!
									#NUM!	#NUM!	#NUM!	#NUM!	#NUM!	0				#NUM!	#NUM!	#DIV/0!	#NUM!		#NUM!	#NUM!
									#NUM!	#NUM!	#NUM!	#NUM!	#NUM!	0				#NUM!	#NUM!	#DIV/0!	#NUM!		#NUM!	#NUM!
									#NUM!	#NUM!	#NUM!	#NUM!	#NUM!	0				#NUM!	#NUM!	#DIV/0!	#NUM!		#NUM!	#NUM!
									#NUM!	#NUM!	#NUM!	#NUM!	#NUM!	0				#NUM!	#NUM!	#DIV/0!	#NUM!		#NUM!	#NUM!
									#NUM!	#NUM!	#NUM!	#NUM!	#NUM!	0				#NUM!	#NUM!	#DIV/0!	#NUM!		#NUM!	#NUM!
									#NUM!	#NUM!	#NUM!	#NUM!	#NUM!	0				#NUM!	#NUM!	#DIV/0!	#NUM!		#NUM!	#NUM!
									#NUM!	#NUM!	#NUM!	#NUM!	#NUM!	0				#NUM!	#NUM!	#DIV/0!	#NUM!		#NUM!	#NUM!
									#NUM!	#NUM!	#NUM!	#NUM!	#NUM!	0				#NUM!	#NUM!	#DIV/0!	#NUM!		#NUM!	#NUM!
									#NUM!	#NUM!	#NUM!	#NUM!	#NUM!	0				#NUM!	#NUM!	#DIV/0!	#NUM!		#NUM!	#NUM!
									#NUM!	#NUM!	#NUM!	#NUM!	#NUM!	0				#NUM!	#NUM!	#DIV/0!	#NUM!		#NUM!	#NUM!
									#NUM!	#NUM!	#NUM!	#NUM!	#NUM!	0				#NUM!	#NUM!	#DIV/0!	#NUM!		#NUM!	#NUM!
									#NUM!	#NUM!	#NUM!	#NUM!	#NUM!	0				#NUM!	#NUM!	#DIV/0!	#NUM!		#NUM!	#NUM!
									#NUM!	#NUM!	#NUM!	#NUM!	#NUM!	0				#NUM!	#NUM!	#DIV/0!	#NUM!		#NUM!	#NUM!
									#NUM!	#NUM!	#NUM!	#NUM!	#NUM!	0				#NUM!	#NUM!	#DIV/0!	#NUM!		#NUM!	#NUM!
									#NUM!	#NUM!	#NUM!	#NUM!	#NUM!	0				#NUM!	#NUM!	#DIV/0!	#NUM!		#NUM!	#NUM!
									#NUM!	#NUM!	#NUM!	#NUM!	#NUM!	0				#NUM!	#NUM!	#DIV/0!	#NUM!		#NUM!	#NUM!
									#NUM!	#NUM!	#NUM!	#NUM!	#NUM!	0				#NUM!	#NUM!	#DIV/0!	#NUM!		#NUM!	#NUM!
									#NUM!	#NUM!	#NUM!	#NUM!	#NUM!	0				#NUM!	#NUM!	#DIV/0!	#NUM!		#NUM!	#NUM!
									#NUM!	#NUM!	#NUM!	#NUM!	#NUM!	0				#NUM!	#NUM!	#DIV/0!	#NUM!		#NUM!	#NUM!
									#NUM!	#NUM!	#NUM!	#NUM!	#NUM!	0				#NUM!	#NUM!	#DIV/0!	#NUM!		#NUM!	#NUM!
									#NUM!	#NUM!	#NUM!	#NUM!	#NUM!	0				#NUM!	#NUM!	#DIV/0!	#NUM!		#NUM!	#NUM!
									#NUM!	#NUM!	#NUM!	#NUM!	#NUM!	0				#NUM!	#NUM!	#DIV/0!	#NUM!		#NUM!	#NUM!
									#NUM!	#NUM!	#NUM!	#NUM!	#NUM!	0				#NUM!	#NUM!	#DIV/0!	#NUM!		#NUM!	#NUM!
									#NUM!	#NUM!	#NUM!	#NUM!	#NUM!	0				#NUM!	#NUM!	#DIV/0!	#NUM!		#NUM!	#NUM!
									#NUM!	#NUM!	#NUM!	#NUM!	#NUM!	0				#NUM!	#NUM!	#DIV/0!	#NUM!		#NUM!	#NUM!
									#NUM!	#NUM!	#NUM!	#NUM!	#NUM!	0				#NUM!	#NUM!	#DIV/0!	#NUM!		#NUM!	#NUM!
									#NUM!	#NUM!	#NUM!	#NUM!	#NUM!	0				#NUM!	#NUM!	#DIV/0!	#NUM!		#NUM!	#NUM!
									#NUM!	#NUM!	#NUM!	#NUM!	#NUM!	0				#NUM!	#NUM!	#DIV/0!	#NUM!		#NUM!	#NUM!
									#NUM!	#NUM!	#NUM!	#NUM!	#NUM!	0				#NUM!	#NUM!	#DIV/0!	#NUM!		#NUM!	#NUM!
									#NUM!	#NUM!	#NUM!	#NUM!	#NUM!	0				#NUM!	#NUM!	#DIV/0!	#NUM!		#NUM!	#NUM!
									#NUM!	#NUM!	#NUM!	#NUM!	#NUM!	0				#NUM!	#NUM!	#DIV/0!	#NUM!		#NUM!	#NUM!
									#NUM!	#NUM!	#NUM!	#NUM!	#NUM!	0				#NUM!	#NUM!	#DIV/0!	#NUM!		#NUM!	#NUM!
									#NUM!	#NUM!	#NUM!	#NUM!	#NUM!	0				#NUM!	#NUM!	#DIV/0!	#NUM!		#NUM!	#NUM!
									#NUM!	#NUM!	#NUM!	#NUM!	#NUM!	0				#NUM!	#NUM!	#DIV/0!	#NUM!		#NUM!	#NUM!
									#NUM!	#NUM!	#NUM!	#NUM!	#NUM!	0				#NUM!	#NUM!	#DIV/0!	#NUM!		#NUM!	#NUM!
									#NUM!	#NUM!	#NUM!	#NUM!	#NUM!	0				#NUM!	#NUM!	#DIV/0!	#NUM!		#NUM!	#NUM!
									#NUM!	#NUM!	#NUM!	#NUM!	#NUM!	0				#NUM!	#NUM!	#DIV/0!	#NUM!		#NUM!	#NUM!
									#NUM!	#NUM!	#NUM!	#NUM!	#NUM!	0				#NUM!	#NUM!	#DIV/0!	#NUM!		#NUM!	#NUM!
									#NUM!	#NUM!	#NUM!	#NUM!	#NUM!	0				#NUM!	#NUM!	#DIV/0!	#NUM!		#NUM!	#NUM!
									#NUM!	#NUM!	#NUM!	#NUM!	#NUM!	0				#NUM!	#NUM!	#DIV/0!	#NUM!		#NUM!	#NUM!
									#NUM!	#NUM!	#NUM!	#NUM!	#NUM!	0				#NUM!	#NUM!	#DIV/0!	#NUM!		#NUM!	#NUM!
									#NUM!	#NUM!	#NUM!	#NUM!	#NUM!	0				#NUM!	#NUM!	#DIV/0!	#NUM!		#NUM!	#NUM!
									#NUM!	#NUM!	#NUM!	#NUM!	#NUM!	0				#NUM!	#NUM!	#DIV/0!	#NUM!		#NUM!	#NUM!
									#NUM!	#NUM!	#NUM!	#NUM!	#NUM!	0				#NUM!	#NUM!	#DIV/0!	#NUM!		#NUM!	#NUM!
									#NUM!	#NUM!	#NUM!	#NUM!	#NUM!	0				#NUM!	#NUM!	#DIV/0!	#NUM!		#NUM!	#NUM!
									#NUM!	#NUM!	#NUM!	#NUM!	#NUM!	0				#NUM!	#NUM!	#DIV/0!	#NUM!		#NUM!	#NUM!
									#NUM!	#NUM!	#NUM!	#NUM!	#NUM!	0				#NUM!	#NUM!	#DIV/0!	#NUM!		#NUM!	#NUM!
									#NUM!	#NUM!	#NUM!	#NUM!	#NUM!	0				#NUM!	#NUM!	#DIV/0!	#NUM!		#NUM!	#NUM!
									#NUM!	#NUM!	#NUM!	#NUM!	#NUM!	0				#NUM!	#NUM!	#DIV/0!	#NUM!		#NUM!	#NUM!
									#NUM!	#NUM!	#NUM!	#NUM!	#NUM!	0				#NUM!	#NUM!	#DIV/0!	#NUM!		#NUM!	#NUM!
									#NUM!	#NUM!	#NUM!	#NUM!	#NUM!	0				#NUM!	#NUM!	#DIV/0!	#NUM!		#NUM!	#NUM!
									#NUM!	#NUM!	#NUM!	#NUM!	#NUM!	0				#NUM!	#NUM!	#DIV/0!	#NUM!		#NUM!	#NUM!
									#NUM!	#NUM!	#NUM!	#NUM!	#NUM!	0				#NUM!	#NUM!	#DIV/0!	#NUM!		#NUM!	#NUM!
									#NUM!	#NUM!	#NUM!	#NUM!	#NUM!	0				#NUM!	#NUM!	#DIV/0!	#NUM!		#NUM!	#NUM!
									#NUM!	#NUM!	#NUM!	#NUM!	#NUM!	0				#NUM!	#NUM!	#DIV/0!	#NUM!		#NUM!	#NUM!
									#NUM!	#NUM!	#NUM!	#NUM!	#NUM!	0				#NUM!	#NUM!	#DIV/0!	#NUM!		#NUM!	#NUM!
									#NUM!	#NUM!	#NUM!	#NUM!	#NUM!	0				#NUM!	#NUM!	#DIV/0!	#NUM!		#NUM!	#NUM!
									#NUM!	#NUM!	#NUM!	#NUM!	#NUM!	0				#NUM!	#NUM!	#DIV/0!	#NUM!		#NUM!	#NUM!
									#NUM!	#NUM!	#NUM!	#NUM!	#NUM!	0				#NUM!	#NUM!	#DIV/0!	#NUM!		#NUM!	#NUM!
									#NUM!	#NUM!	#NUM!	#NUM!	#NUM!	0				#NUM!	#NUM!	#DIV/0!	#NUM!		#NUM!	#NUM!
									#NUM!	#NUM!	#NUM!	#NUM!	#NUM!	0				#NUM!	#NUM!	#DIV/0!	#NUM!		#NUM!	#NUM!
									#NUM!	#NUM!	#NUM!	#NUM!	#NUM!	0				#NUM!	#NUM!	#DIV/0!	#NUM!		#NUM!	#NUM!
									#NUM!	#NUM!	#NUM!	#NUM!	#NUM!	0				#NUM!	#NUM!	#DIV/0!	#NUM!		#NUM!	#NUM!
									#NUM!	#NUM!	#NUM!	#NUM!	#NUM!	0				#NUM!	#NUM!	#DIV/0!	#NUM!		#NUM!	#NUM!
									#NUM!	#NUM!	#NUM!	#NUM!	#NUM!	0				#NUM!	#NUM!	#DIV/0!	#NUM!		#NUM!	#NUM!
									#NUM!	#NUM!	#NUM!	#NUM!	#NUM!	0				#NUM!	#NUM!	#DIV/0!	#NUM!		#NUM!	#NUM!
									#NUM!	#NUM!	#NUM!	#NUM!	#NUM!	0				#NUM!	#NUM!	#DIV/0!	#NUM!		#NUM!	#NUM!
									#NUM!	#NUM!	#NUM!	#NUM!	#NUM!	0				#NUM!	#NUM!	#DIV/0!	#NUM!		#NUM!	#NUM!
									#NUM!	#NUM!	#NUM!	#NUM!	#NUM!	0				#NUM!	#NUM!	#DIV/0!	#NUM!		#NUM!	#NUM!
									#NUM!	#NUM!	#NUM!	#NUM!	#NUM!	0				#NUM!	#NUM!	#DIV/0!	#NUM!		#NUM!	#NUM!
									#NUM!	#NUM!	#NUM!	#NUM!	#NUM!	0				#NUM!	#NUM!	#DIV/0!	#NUM!		#NUM!	#NUM!
									#NUM!	#NUM!	#NUM!	#NUM!	#NUM!	0				#NUM!	#NUM!	#DIV/0!	#NUM!		#NUM!	#NUM!
									#NUM!	#NUM!	#NUM!	#NUM!	#NUM!	0				#NUM!	#NUM!	#DIV/0!	#NUM!		#NUM!	#NUM!
									#NUM!	#NUM!	#NUM!	#NUM!	#NUM!	0				#NUM!	#NUM!	#DIV/0!	#NUM!		#NUM!	#NUM!
									#NUM!	#NUM!	#NUM!	#NUM!	#NUM!	0				#NUM!	#NUM!	#DIV/0!	#NUM!		#NUM!	#NUM!
									#NUM!	#NUM!	#NUM!	#NUM!	#NUM!	0				#NUM!	#NUM!	#DIV/0!	#NUM!		#NUM!	#NUM!
									#NUM!	#NUM!	#NUM!	#NUM!	#NUM!	0				#NUM!	#NUM!	#DIV/0!	#NUM!		#NUM!	#NUM!
									#NUM!	#NUM!	#NUM!	#NUM!	#NUM!	0				#NUM!	#NUM!	#DIV/0!	#NUM!		#NUM!	#NUM!
									#NUM!	#NUM!	#NUM!	#NUM!	#NUM!	0				#NUM!	#NUM!	#DIV/0!	#NUM!		#NUM!	#NUM!
									#NUM!	#NUM!	#NUM!	#NUM!	#NUM!	0				#NUM!	#NUM!	#DIV/0!	#NUM!		#NUM!	#NUM!
									#NUM!	#NUM!	#NUM!	#NUM!	#NUM!	0				#NUM!	#NUM!	#DIV/0!	#NUM!		#NUM!	#NUM!
									#NUM!	#NUM!	#NUM!	#NUM!	#NUM!	0				#NUM!	#NUM!	#DIV/0!	#NUM!		#NUM!	#NUM!
									#NUM!	#NUM!	#NUM!	#NUM!	#NUM!	0				#NUM!	#NUM!	#DIV/0!	#NUM!		#NUM!	#NUM!
									#NUM!	#NUM!	#NUM!	#NUM!	#NUM!	0				#NUM!	#NUM!	#DIV/0!	#NUM!		#NUM!	#NUM!
									#NUM!	#NUM!	#NUM!	#NUM!	#NUM!	0				#NUM!	#NUM!	#DIV/0!	#NUM!		#NUM!	#NUM!
									#NUM!	#NUM!	#NUM!	#NUM!	#NUM!	0				#NUM!	#NUM!	#DIV/0!	#NUM!		#NUM!	#NUM!
									#NUM!	#NUM!	#NUM!	#NUM!	#NUM!	0				#NUM!	#NUM!	#DIV/0!	#NUM!		#NUM!	#NUM!
									#NUM!	#NUM!	#NUM!	#NUM!	#NUM!	0				#NUM!	#NUM!	#DIV/0!	#NUM!		#NUM!	#NUM!
									#NUM!	#NUM!	#NUM!	#NUM!	#NUM!	0				#NUM!	#NUM!	#DIV/0!	#NUM!		#NUM!	#NUM!
									#NUM!	#NUM!	#NUM!	#NUM!	#NUM!	0				#NUM!	#NUM!	#DIV/0!	#NUM!		#NUM!	#NUM!
									#NUM!	#NUM!	#NUM!	#NUM!	#NUM!	0				#NUM!	#NUM!	#DIV/0!	#NUM!		#NUM!	#NUM!
									#NUM!	#NUM!	#NUM!	#NUM!	#NUM!	0				#NUM!	#NUM!	#DIV/0!	#NUM!		#NUM!	#NUM!
									#NUM!	#NUM!	#NUM!	#NUM!	#NUM!	0				#NUM!	#NUM!	#DIV/0!	#NUM!		#NUM!	#NUM!
									#NUM!	#NUM!	#NUM!	#NUM!	#NUM!	0				#NUM!	#NUM!	#DIV/0!	#NUM!		#NUM!	#NUM!
									#NUM!	#NUM!	#NUM!	#NUM!	#NUM!	0				#NUM!	#NUM!	#DIV/0!	#NUM!		#NUM!	#NUM!
									#NUM!	#NUM!	#NUM!	#NUM!	#NUM!	0				#NUM!	#NUM!	#DIV/0!	#NUM!		#NUM!	#NUM!
									#NUM!	#NUM!	#NUM!	#NUM!	#NUM!	0				#NUM!	#NUM!	#DIV/0!	#NUM!		#NUM!	#NUM!
									#NUM!	#NUM!	#NUM!	#NUM!	#NUM!	0				#NUM!	#NUM!	#DIV/0!	#NUM!		#NUM!	#NUM!
									#NUM!	#NUM!	#NUM!	#NUM!	#NUM!	0				#NUM!	#NUM!	#DIV/0!	#NUM!		#NUM!	#NUM!
									#NUM!	#NUM!	#NUM!	#NUM!	#NUM!	0				#NUM!	#NUM!	#DIV/0!	#NUM!		#NUM!	#NUM!
									#NUM!	#NUM!	#NUM!	#NUM!	#NUM!	0				#NUM!	#NUM!	#DIV/0!	#NUM!		#NUM!	#NUM!
									#NUM!	#NUM!	#NUM!	#NUM!	#NUM!	0				#NUM!	#NUM!	#DIV/0!	#NUM!		#NUM!	#NUM!
									#NUM!	#NUM!	#NUM!	#NUM!	#NUM!	0				#NUM!	#NUM!	#DIV/0!	#NUM!		#NUM!	#NUM!
									#NUM!	#NUM!	#NUM!	#NUM!	#NUM!	0				#NUM!	#NUM!	#DIV/0!	#NUM!		#NUM!	#NUM!
									#NUM!	#NUM!	#NUM!	#NUM!	#NUM!	0				#NUM!	#NUM!	#DIV/0!	#NUM!		#NUM!	#NUM!
									#NUM!	#NUM!	#NUM!	#NUM!	#NUM!	0				#NUM!	#NUM!	#DIV/0!	#NUM!		#NUM!	#NUM!
									#NUM!	#NUM!	#NUM!	#NUM!	#NUM!	0				#NUM!	#NUM!	#DIV/0!	#NUM!		#NUM!	#NUM!
									#NUM!	#NUM!	#NUM!	#NUM!	#NUM!	0				#NUM!	#NUM!	#DIV/0!	#NUM!		#NUM!	#NUM!
									#NUM!	#NUM!	#NUM!	#NUM!	#NUM!	0				#NUM!	#NUM!	#DIV/0!	#NUM!		#NUM!	#NUM!
									#NUM!	#NUM!	#NUM!	#NUM!	#NUM!	0				#NUM!	#NUM!	#DIV/0!	#NUM!		#NUM!	#NUM!
									#NUM!	#NUM!	#NUM!	#NUM!	#NUM!	0				#NUM!	#NUM!	#DIV/0!	#NUM!		#NUM!	#NUM!
									#NUM!	#NUM!	#NUM!	#NUM!	#NUM!	0				#NUM!	#NUM!	#DIV/0!	#NUM!		#NUM!	#NUM!
									#NUM!	#NUM!	#NUM!	#NUM!	#NUM!	0				#NUM!	#NUM!	#DIV/0!	#NUM!		#NUM!	#NUM!
									#NUM!	#NUM!	#NUM!	#NUM!	#NUM!	0				#NUM!	#NUM!	#DIV/0!	#NUM!		#NUM!	#NUM!
									#NUM!	#NUM!	#NUM!	#NUM!	#NUM!	0				#NUM!	#NUM!	#DIV/0!	#NUM!		#NUM!	#NUM!
									#NUM!	#NUM!	#NUM!	#NUM!	#NUM!	0				#NUM!	#NUM!	#DIV/0!	#NUM!		#NUM!	#NUM!
									#NUM!	#NUM!	#NUM!	#NUM!	#NUM!	0				#NUM!	#NUM!	#DIV/0!	#NUM!		#NUM!	#NUM!
									#NUM!	#NUM!	#NUM!	#NUM!	#NUM!	0				#NUM!	#NUM!	#DIV/0!	#NUM!		#NUM!	#NUM!
									#NUM!	#NUM!	#NUM!	#NUM!	#NUM!	0				#NUM!	#NUM!	#DIV/0!	#NUM!		#NUM!	#NUM!
									#NUM!	#NUM!	#NUM!	#NUM!	#NUM!	0				#NUM!	#NUM!	#DIV/0!	#NUM!		#NUM!	#NUM!
									#NUM!	#NUM!	#NUM!	#NUM!	#NUM!	0				#NUM!	#NUM!	#DIV/0!	#NUM!		#NUM!	#NUM!
									#NUM!	#NUM!	#NUM!	#NUM!	#NUM!	0				#NUM!	#NUM!	#DIV/0!	#NUM!		#NUM!	#NUM!
									#NUM!	#NUM!	#NUM!	#NUM!	#NUM!	0				#NUM!	#NUM!	#DIV/0!	#NUM!		#NUM!	#NUM!
									#NUM!	#NUM!	#NUM!	#NUM!	#NUM!	0				#NUM!	#NUM!	#DIV/0!	#NUM!		#NUM!	#NUM!
									#NUM!	#NUM!	#NUM!	#NUM!	#NUM!	0				#NUM!	#NUM!	#DIV/0!	#NUM!		#NUM!	#NUM!
									#NUM!	#NUM!	#NUM!	#NUM!	#NUM!	0				#NUM!	#NUM!	#DIV/0!	#NUM!		#NUM!	#NUM!
									#NUM!	#NUM!	#NUM!	#NUM!	#NUM!	0				#NUM!	#NUM!	#DIV/0!	#NUM!		#NUM!	#NUM!
									#NUM!	#NUM!	#NUM!	#NUM!	#NUM!	0				#NUM!	#NUM!	#DIV/0!	#NUM!		#NUM!	#NUM!
									#NUM!	#NUM!	#NUM!	#NUM!	#NUM!	0				#NUM!	#NUM!	#DIV/0!	#NUM!		#NUM!	#NUM!
									#NUM!	#NUM!	#NUM!	#NUM!	#NUM!	0				#NUM!	#NUM!	#DIV/0!	#NUM!		#NUM!	#NUM!
									#NUM!	#NUM!	#NUM!	#NUM!	#NUM!	0				#NUM!	#NUM!	#DIV/0!	#NUM!		#NUM!	#NUM!
									#NUM!	#NUM!	#NUM!	#NUM!	#NUM!	0				#NUM!	#NUM!	#DIV/0!	#NUM!		#NUM!	#NUM!
									#NUM!	#NUM!	#NUM!	#NUM!	#NUM!	0				#NUM!	#NUM!	#DIV/0!	#NUM!		#NUM!	#NUM!
									#NUM!	#NUM!	#NUM!	#NUM!	#NUM!	0				#NUM!	#NUM!	#DIV/0!	#NUM!		#NUM!	#NUM!
									#NUM!	#NUM!	#NUM!	#NUM!	#NUM!	0				#NUM!	#NUM!	#DIV/0!	#NUM!		#NUM!	#NUM!
									#NUM!	#NUM!	#NUM!	#NUM!	#NUM!	0				#NUM!	#NUM!	#DIV/0!	#NUM!		#NUM!	#NUM!
									#NUM!	#NUM!	#NUM!	#NUM!	#NUM!	0				#NUM!	#NUM!	#DIV/0!	#NUM!		#NUM!	#NUM!
									#NUM!	#NUM!	#NUM!	#NUM!	#NUM!	0				#NUM!	#NUM!	#DIV/0!	#NUM!		#NUM!	#NUM!
									#NUM!	#NUM!	#NUM!	#NUM!	#NUM!	0				#NUM!	#NUM!	#DIV/0!	#NUM!		#NUM!	#NUM!
									#NUM!	#NUM!	#NUM!	#NUM!	#NUM!	0				#NUM!	#NUM!	#DIV/0!	#NUM!		#NUM!	#NUM!
									#NUM!	#NUM!	#NUM!	#NUM!	#NUM!	0				#NUM!	#NUM!	#DIV/0!	#NUM!		#NUM!	#NUM!
									#NUM!	#NUM!	#NUM!	#NUM!	#NUM!	0				#NUM!	#NUM!	#DIV/0!	#NUM!		#NUM!	#NUM!
									#NUM!	#NUM!	#NUM!	#NUM!	#NUM!	0				#NUM!	#NUM!	#DIV/0!	#NUM!		#NUM!	#NUM!
									#NUM!	#NUM!	#NUM!	#NUM!	#NUM!	0				#NUM!	#NUM!	#DIV/0!	#NUM!		#NUM!	#NUM!
									#NUM!	#NUM!	#NUM!	#NUM!	#NUM!	0				#NUM!	#NUM!	#DIV/0!	#NUM!		#NUM!	#NUM!
									#NUM!	#NUM!	#NUM!	#NUM!	#NUM!	0				#NUM!	#NUM!	#DIV/0!	#NUM!		#NUM!	#NUM!
									#NUM!	#NUM!	#NUM!	#NUM!	#NUM!	0				#NUM!	#NUM!	#DIV/0!	#NUM!		#NUM!	#NUM!
									#NUM!	#NUM!	#NUM!	#NUM!	#NUM!	0				#NUM!	#NUM!	#DIV/0!	#NUM!		#NUM!	#NUM!
									#NUM!	#NUM!	#NUM!	#NUM!	#NUM!	0				#NUM!	#NUM!	#DIV/0!	#NUM!		#NUM!	#NUM!
									#NUM!	#NUM!	#NUM!	#NUM!	#NUM!	0				#NUM!	#NUM!	#DIV/0!	#NUM!		#NUM!	#NUM!
									#NUM!	#NUM!	#NUM!	#NUM!	#NUM!	0				#NUM!	#NUM!	#DIV/0!	#NUM!		#NUM!	#NUM!
									#NUM!	#NUM!	#NUM!	#NUM!	#NUM!	0				#NUM!	#NUM!	#DIV/0!	#NUM!		#NUM!	#NUM!
									#NUM!	#NUM!	#NUM!	#NUM!	#NUM!	0				#NUM!	#NUM!	#DIV/0!	#NUM!		#NUM!	#NUM!
									#NUM!	#NUM!	#NUM!	#NUM!	#NUM!	0				#NUM!	#NUM!	#DIV/0!	#NUM!		#NUM!	#NUM!
									#NUM!	#NUM!	#NUM!	#NUM!	#NUM!	0				#NUM!	#NUM!	#DIV/0!	#NUM!		#NUM!	#NUM!
									#NUM!	#NUM!	#NUM!	#NUM!	#NUM!	0				#NUM!	#NUM!	#DIV/0!	#NUM!		#NUM!	#NUM!
									#NUM!	#NUM!	#NUM!	#NUM!	#NUM!	0				#NUM!	#NUM!	#DIV/0!	#NUM!		#NUM!	#NUM!
									#NUM!	#NUM!	#NUM!	#NUM!	#NUM!	0				#NUM!	#NUM!	#DIV/0!	#NUM!		#NUM!	#NUM!
									#NUM!	#NUM!	#NUM!	#NUM!	#NUM!	0				#NUM!	#NUM!	#DIV/0!	#NUM!		#NUM!	#NUM!
									#NUM!	#NUM!	#NUM!	#NUM!	#NUM!	0				#NUM!	#NUM!	#DIV/0!	#NUM!		#NUM!	#NUM!
									#NUM!	#NUM!	#NUM!	#NUM!	#NUM!	0				#NUM!	#NUM!	#DIV/0!	#NUM!		#NUM!	#NUM!
									#NUM!	#NUM!	#NUM!	#NUM!	#NUM!	0				#NUM!	#NUM!	#DIV/0!	#NUM!		#NUM!	#NUM!
									#NUM!	#NUM!	#NUM!	#NUM!	#NUM!	0				#NUM!	#NUM!	#DIV/0!	#NUM!		#NUM!	#NUM!
									#NUM!	#NUM!	#NUM!	#NUM!	#NUM!	0				#NUM!	#NUM!	#DIV/0!	#NUM!		#NUM!	#NUM!
									#NUM!	#NUM!	#NUM!	#NUM!	#NUM!	0				#NUM!	#NUM!	#DIV/0!	#NUM!		#NUM!	#NUM!
									#NUM!	#NUM!	#NUM!	#NUM!	#NUM!	0				#NUM!	#NUM!	#DIV/0!	#NUM!		#NUM!	#NUM!
									#NUM!	#NUM!	#NUM!	#NUM!	#NUM!	0				#NUM!	#NUM!	#DIV/0!	#NUM!		#NUM!	#NUM!
									#NUM!	#NUM!	#NUM!	#NUM!	#NUM!	0				#NUM!	#NUM!	#DIV/0!	#NUM!		#NUM!	#NUM!
									#NUM!	#NUM!	#NUM!	#NUM!	#NUM!	0				#NUM!	#NUM!	#DIV/0!	#NUM!		#NUM!	#NUM!
									#NUM!	#NUM!	#NUM!	#NUM!	#NUM!	0				#NUM!	#NUM!	#DIV/0!	#NUM!		#NUM!	#NUM!
									#NUM!	#NUM!	#NUM!	#NUM!	#NUM!	0				#NUM!	#NUM!	#DIV/0!	#NUM!		#NUM!	#NUM!
									#NUM!	#NUM!	#NUM!	#NUM!	#NUM!	0				#NUM!	#NUM!	#DIV/0!	#NUM!		#NUM!	#NUM!
									#NUM!	#NUM!	#NUM!	#NUM!	#NUM!	0				#NUM!	#NUM!	#DIV/0!	#NUM!		#NUM!	#NUM!
									#NUM!	#NUM!	#NUM!	#NUM!	#NUM!	0				#NUM!	#NUM!	#DIV/0!	#NUM!		#NUM!	#NUM!
									#NUM!	#NUM!	#NUM!	#NUM!	#NUM!	0				#NUM!	#NUM!	#DIV/0!	#NUM!		#NUM!	#NUM!
									#NUM!	#NUM!	#NUM!	#NUM!	#NUM!	0				#NUM!	#NUM!	#DIV/0!	#NUM!		#NUM!	#NUM!
									#NUM!	#NUM!	#NUM!	#NUM!	#NUM!	0				#NUM!	#NUM!	#DIV/0!	#NUM!		#NUM!	#NUM!
									#NUM!	#NUM!	#NUM!	#NUM!	#NUM!	0				#NUM!	#NUM!	#DIV/0!	#NUM!		#NUM!	#NUM!
									#NUM!	#NUM!	#NUM!	#NUM!	#NUM!	0				#NUM!	#NUM!	#DIV/0!	#NUM!		#NUM!	#NUM!
									#NUM!	#NUM!	#NUM!	#NUM!	#NUM!	0				#NUM!	#NUM!	#DIV/0!	#NUM!		#NUM!	#NUM!
									#NUM!	#NUM!	#NUM!	#NUM!	#NUM!	0				#NUM!	#NUM!	#DIV/0!	#NUM!		#NUM!	#NUM!
									#NUM!	#NUM!	#NUM!	#NUM!	#NUM!	0				#NUM!	#NUM!	#DIV/0!	#NUM!		#NUM!	#NUM!
									#NUM!	#NUM!	#NUM!	#NUM!	#NUM!	0				#NUM!	#NUM!	#DIV/0!	#NUM!		#NUM!	#NUM!
									#NUM!	#NUM!	#NUM!	#NUM!	#NUM!	0				#NUM!	#NUM!	#DIV/0!	#NUM!		#NUM!	#NUM!
									#NUM!	#NUM!	#NUM!	#NUM!	#NUM!	0				#NUM!	#NUM!	#DIV/0!	#NUM!		#NUM!	#NUM!
									#NUM!	#NUM!	#NUM!	#NUM!	#NUM!	0				#NUM!	#NUM!	#DIV/0!	#NUM!		#NUM!	#NUM!
									#NUM!	#NUM!	#NUM!	#NUM!	#NUM!	0				#NUM!	#NUM!	#DIV/0!	#NUM!		#NUM!	#NUM!
									#NUM!	#NUM!	#NUM!	#NUM!	#NUM!	0				#NUM!	#NUM!	#DIV/0!	#NUM!		#NUM!	#NUM!
									#NUM!	#NUM!	#NUM!	#NUM!	#NUM!	0				#NUM!	#NUM!	#DIV/0!	#NUM!		#NUM!	#NUM!
									#NUM!	#NUM!	#NUM!	#NUM!	#NUM!	0				#NUM!	#NUM!	#DIV/0!	#NUM!		#NUM!	#NUM!
									#NUM!	#NUM!	#NUM!	#NUM!	#NUM!	0				#NUM!	#NUM!	#DIV/0!	#NUM!		#NUM!	#NUM!
									#NUM!	#NUM!	#NUM!	#NUM!	#NUM!	0				#NUM!	#NUM!	#DIV/0!	#NUM!		#NUM!	#NUM!
									#NUM!	#NUM!	#NUM!	#NUM!	#NUM!	0				#NUM!	#NUM!	#DIV/0!	#NUM!		#NUM!	#NUM!
									#NUM!	#NUM!	#NUM!	#NUM!	#NUM!	0				#NUM!	#NUM!	#DIV/0!	#NUM!		#NUM!	#NUM!
									#NUM!	#NUM!	#NUM!	#NUM!	#NUM!	0				#NUM!	#NUM!	#DIV/0!	#NUM!		#NUM!	#NUM!
									#NUM!	#NUM!	#NUM!	#NUM!	#NUM!	0				#NUM!	#NUM!	#DIV/0!	#NUM!		#NUM!	#NUM!
									#NUM!	#NUM!	#NUM!	#NUM!	#NUM!	0				#NUM!	#NUM!	#DIV/0!	#NUM!		#NUM!	#NUM!
									#NUM!	#NUM!	#NUM!	#NUM!	#NUM!	0				#NUM!	#NUM!	#DIV/0!	#NUM!		#NUM!	#NUM!
									#NUM!	#NUM!	#NUM!	#NUM!	#NUM!	0				#NUM!	#NUM!	#DIV/0!	#NUM!		#NUM!	#NUM!
									#NUM!	#NUM!	#NUM!	#NUM!	#NUM!	0				#NUM!	#NUM!	#DIV/0!	#NUM!		#NUM!	#NUM!
									#NUM!	#NUM!	#NUM!	#NUM!	#NUM!	0				#NUM!	#NUM!	#DIV/0!	#NUM!		#NUM!	#NUM!
									#NUM!	#NUM!	#NUM!	#NUM!	#NUM!	0				#NUM!	#NUM!	#DIV/0!	#NUM!		#NUM!	#NUM!
									#NUM!	#NUM!	#NUM!	#NUM!	#NUM!	0				#NUM!	#NUM!	#DIV/0!	#NUM!		#NUM!	#NUM!
									#NUM!	#NUM!	#NUM!	#NUM!	#NUM!	0				#NUM!	#NUM!	#DIV/0!	#NUM!		#NUM!	#NUM!
									#NUM!	#NUM!	#NUM!	#NUM!	#NUM!	0				#NUM!	#NUM!	#DIV/0!	#NUM!		#NUM!	#NUM!
									#NUM!	#NUM!	#NUM!	#NUM!	#NUM!	0				#NUM!	#NUM!	#DIV/0!	#NUM!		#NUM!	#NUM!
									#NUM!	#NUM!	#NUM!	#NUM!	#NUM!	0				#NUM!	#NUM!	#DIV/0!	#NUM!		#NUM!	#NUM!
									#NUM!	#NUM!	#NUM!	#NUM!	#NUM!	0				#NUM!	#NUM!	#DIV/0!	#NUM!		#NUM!	#NUM!
									#NUM!	#NUM!	#NUM!	#NUM!	#NUM!	0				#NUM!	#NUM!	#DIV/0!	#NUM!		#NUM!	#NUM!
